# Supplementary material
Source: publisher figshare collection journal article supplement (https://gsajournals.figshare.com/ndownloader/files/22291740)
Supplement: Supplementary file 1 [file 22291740]

**Table S5. Ant genes leading to enrichment of immunoglobulin PFAM domains in ant WGCNA modules A14 and A15. Many of these genes have developmental and functional associations with neuronal tissues (but not always exclusively).**

| **BLAST annotation** | **Neuron associated** | **References** |
| --- | --- | --- |
| basement membrane-specific heparan sulfate proteoglycan core protein | yes | (Lindner *et al.* 2007; Cho *et al.* 2012) |
| cell adhesion molecule 2 | - |  |
| Down syndrome cell adhesion molecule-like protein Dscam2 | yes | (Clandinin and Zipursky 2002; Lah *et al.* 2014) |
| follistatin-related protein 5 | yes | (Bickel *et al.* 2008; Pentek *et al.* 2009) |
| hemicentin-2 | - |  |
| igLON family member 5 | yes | (Carrillo *et al.* 2015) |
| immunoglobulin domain-containing protein oig-4 | yes | (Rapti *et al.* 2011; Sengupta *et al.* 2019) |
| inactive tyrosine-protein kinase 7 | - |  |
| irregular chiasm C-roughest protein | yes  (esp. antennae) | (Ramos *et al.* 1993; Venugopala Reddy *et al.* 1999) |
| lachesin | yes | (Karlstrom *et al.* 1993; Strigini *et al.* 2006) |
| leucine-rich repeat-containing protein 24 | yes | (Dolan *et al.* 2007; Carrillo *et al.* 2015) |
| leucine-rich repeat-containing protein 4 | yes | (Dolan *et al.* 2007; Carrillo *et al.* 2015) |
| neogenin | yes | (Wilson and Key 2007) |
| nephrin | yes (mammal)  nephrocytes (insect) | (Zhuang *et al.* 2009; Li *et al.* 2011) |
| netrin receptor UNC5C | yes | (Keleman and Dickson 2001; Kang *et al.* 2019) |
| neuroglian | yes | (Godenschwege and Murphey 2009; Goossens *et al.* 2011) |
| neurotrimin | yes (mammal) | (Krizsan-Agbas *et al.* 2008; Sanz *et al.* 2015) |
| neurotrimin-like | yes | (Krizsan-Agbas *et al.* 2008; Sanz *et al.* 2015) |
| obscurin | -  (muscle) | (Katzemich *et al.* 2012, 2015) |
| opioid-binding protein/cell adhesion molecule homolog | yes (mammal) | (Miyata *et al.* 2003; Reed *et al.* 2007) |
| peroxidasin | - |  |
| protein borderless | yes | (Shaw *et al.* 2019) |
| protogenin | yes | (Wong *et al.* 2010; Yu *et al.* 2013) |
| T-lymphocyte activation antigen CD86 | - |  |
| tyrosine-protein phosphatase Lar | yes | (Sethi *et al.* 2010; Agrawal and Hardin 2016) |
| zwei Ig domain protein zig-8 | yes | (Bénard *et al.* 2012; Cheng *et al.* 2019) |

Agrawal, P., and P. E. Hardin, 2016 The *Drosophila* Receptor Protein Tyrosine Phosphatase LAR Is Required for Development of Circadian Pacemaker Neuron Processes That Support Rhythmic Activity in Constant Darkness But Not during Light/Dark Cycles. J. Neurosci. 36: 3860–70.

Bénard, C. Y., C. Blanchette, J. Recio, and O. Hobert, 2012 The Secreted Immunoglobulin Domain Proteins ZIG-5 and ZIG-8 Cooperate with L1CAM/SAX-7 to Maintain Nervous System Integrity (A. D. Chisholm, Ed.). PLoS Genet. 8: e1002819.

Bickel, D., R. Shah, S. C. Gesualdi, and T. E. Haerry, 2008 *Drosophila* Follistatin exhibits unique structural modifications and interacts with several TGF-β family members. Mech. Dev. 125: 117–129.

Carrillo, R. A., E. Özkan, K. P. Menon, S. Nagarkar-Jaiswal, P.-T. Lee *et al.*, 2015 Control of Synaptic Connectivity by a Network of *Drosophila* IgSF Cell Surface Proteins. Cell 163: 1770–1782.

Cheng, S., Y. Park, J. D. Kurleto, M. Jeon, K. Zinn *et al.*, 2019 Family of neural wiring receptors in bilaterians defined by phylogenetic, biochemical, and structural evidence. Proc. Natl. Acad. Sci. U. S. A. 116: 9837–9842.

Cho, J. Y., K. Chak, B. J. Andreone, J. R. Wooley, and A. L. Kolodkin, 2012 The extracellular matrix proteoglycan perlecan facilitates transmembrane semaphorin-mediated repulsive guidance. Genes Dev. 26: 2222–35.

Clandinin, T. R., and S. L. Zipursky, 2002 Making Connections in the Fly Visual System. Neuron 35: 827–841.

Dolan, J., K. Walshe, S. Alsbury, K. Hokamp, S. O’Keeffe *et al.*, 2007 The extracellular Leucine-Rich Repeat superfamily; a comparative survey and analysis of evolutionary relationships and expression patterns. BMC Genomics 8: 320.

Godenschwege, T. A., and R. K. Murphey, 2009 Genetic interaction of Neuroglian and Semaphorin1a during guidance and synapse formation. J. Neurogenet. 23: 147–55.

Goossens, T., Y. Y. Kang, G. Wuytens, P. Zimmermann, Z. Callaerts-Végh *et al.*, 2011 The Drosophila L1CAM homolog Neuroglian signals through distinct pathways to control different aspects of mushroom body axon development. Development 138: 1595–605.

Kang, H., J. Zhao, X. Jiang, G. Li, W. Huang *et al.*, 2019 Drosophila Netrin-B controls mushroom body axon extension and regulates courtship-associated learning and memory of a *Drosophila* fragile X syndrome model. Mol. Brain 12: 52.

Karlstrom, R. O., L. P. Wilder, and M. J. Bastiani, 1993 Lachesin: an immunoglobulin superfamily protein whose expression correlates with neurogenesis in grasshopper embryos. Development 118:.

Katzemich, A., N. Kreisköther, A. Alexandrovich, C. Elliott, F. Schöck *et al.*, 2012 The function of the M-line protein obscurin in controlling the symmetry of the sarcomere in the flight muscle of Drosophila. J. Cell Sci. 125: 3367–79.

Katzemich, A., R. J. H. West, A. Fukuzawa, S. T. Sweeney, M. Gautel *et al.*, 2015 Binding partners of the kinase domains in *Drosophila* obscurin and their effect on the structure of the flight muscle. J. Cell Sci. 128: 3386–97.

Keleman, K., and B. J. Dickson, 2001 Short- and Long-Range Repulsion by the *Drosophila* Unc5 Netrin Receptor. Neuron 32: 605–617.

Krizsan-Agbas, D., T. Pedchenko, and P. G. Smith, 2008 Neurotrimin is an estrogen-regulated determinant of peripheral sympathetic innervation. J. Neurosci. Res. 86: 3086–3095.

Lah, G. J., J. S. S. Li, and S. S. Millard, 2014 Cell-Specific Alternative Splicing of Drosophila Dscam2 Is Crucial for Proper Neuronal Wiring. Neuron 83: 1376–1388.

Li, M., S. Armelloni, M. Ikehata, A. Corbelli, M. Pesaresi *et al.*, 2011 Nephrin expression in adult rodent central nervous system and its interaction with glutamate receptors. J. Pathol. 225: 118–128.

Lindner, J. R., P. R. Hillman, A. L. Barrett, M. C. Jackson, T. L. Perry *et al.*, 2007 The Drosophila Perlecan gene trol regulates multiple signaling pathways in different developmental contexts. BMC Dev. Biol. 7: 121.

Miyata, S., K. Taguchi, and S. Maekawa, 2003 Dendrite-associated opioid-binding cell adhesion molecule localizes at neurosecretory granules in the hypothalamic magnocellular neurons. Neuroscience 122: 169–181.

Pentek, J., L. Parker, A. Wu, and K. Arora, 2009 Follistatin preferentially antagonizes activin rather than BMP signaling in *Drosophila*. genesis 47: 261–273.

Ramos, R. G. P., G. L. Igloi, B. Lichte, U. Baumann, D. Maier *et al.*, 1993 The irregular chiasm C-roughest locus of Drosophila, which affects axonal projections and programmed cell death, encodes a novel immunoglobulin-like protein. Genes Dev. 7: 2533–2547.

Rapti, G., J. Richmond, and J.-L. Bessereau, 2011 A single immunoglobulin-domain protein required for clustering acetylcholine receptors in C. elegans. EMBO J. 30: 706–18.

Reed, J. E., J. R. Dunn, D. G. du Plessis, E. J. Shaw, P. Reeves *et al.*, 2007 Expression of cellular adhesion molecule “OPCML” is down-regulated in gliomas and other brain tumours. Neuropathol. Appl. Neurobiol. 33: 77–85.

Sanz, R., G. B. Ferraro, and A. E. Fournier, 2015 IgLON cell adhesion molecules are shed from the cell surface of cortical neurons to promote neuronal growth. J. Biol. Chem. 290: 4330–42.

Sengupta, S., L. B. Crowe, S. You, M. A. Roberts, and F. R. Jackson, 2019 A Secreted Ig-Domain Protein Required in Both Astrocytes and Neurons for Regulation of *Drosophila* Night Sleep. Curr. Biol. 29: 2547-2554.e2.

Sethi, J., B. Zhao, V. Cuvillier-Hot, C. Boidin-Wichlacz, M. Salzet *et al.*, 2010 The receptor protein tyrosine phosphatase HmLAR1 is up-regulated in the CNS of the adult medicinal leech following injury and is required for neuronal sprouting and regeneration. Mol. Cell. Neurosci. 45: 430–438.

Shaw, H. S., S. A. Cameron, W.-T. Chang, and Y. Rao, 2019 The Conserved IgSF9 Protein Borderless Regulates Axonal Transport of Presynaptic Components and Color Vision in Drosophila. J. Neurosci. 39: 6817–6828.

Strigini, M., R. Cantera, X. Morin, M. J. Bastiani, M. Bate *et al.*, 2006 The IgLON protein Lachesin is required for the blood–brain barrier in *Drosophila*. Mol. Cell. Neurosci. 32: 91–101.

Venugopala Reddy, G., C. Reiter, S. Shanbhag, K.-F. Fischbach, and V. Rodrigues, 1999 Irregular chiasm-C-roughest, a member of the immunoglobulin superfamily, affects sense organ spacing on the Drosophila antenna by influencing the positioning of founder cells on the disc ectoderm. Dev. Genes Evol. 209: 581–591.

Wilson, N. H., and B. Key, 2007 Neogenin: One receptor, many functions. Int. J. Biochem. Cell Biol. 39: 874–878.

Wong, Y.-H., A.-C. Lu, Y.-C. Wang, H.-C. Cheng, C. Chang *et al.*, 2010 Protogenin Defines a Transition Stage during Embryonic Neurogenesis and Prevents Precocious Neuronal Differentiation. J. Neurosci. 30: 4428–4439.

Yu, X. M., I. Gutman, T. J. Mosca, T. Iram, E. Ozkan *et al.*, 2013 Plum, an immunoglobulin superfamily protein, regulates axon pruning by facilitating TGF-β signaling. Neuron 78: 456–68.

Zhuang, S., H. Shao, F. Guo, R. Trimble, E. Pearce *et al.*, 2009 Sns and Kirre, the *Drosophila* orthologs of Nephrin and Neph1, direct adhesion, fusion and formation of a slit diaphragm-like structure in insect nephrocytes. Development 136: 2335–44.
